# Supplementary material for: Prostate cancer therapy personalization via multi-modal deep learning on randomized phase III clinical trials
Source: PubMed Central journal article supplement (PMC9177850; doi:10.1038/s41746-022-00613-w), 2022-06-08
Supplement: 41746_2022_613_MOESM1_ESM.pdf [file 41746_2022_613_MOESM1_ESM.pdf]

## Supplementary Figures

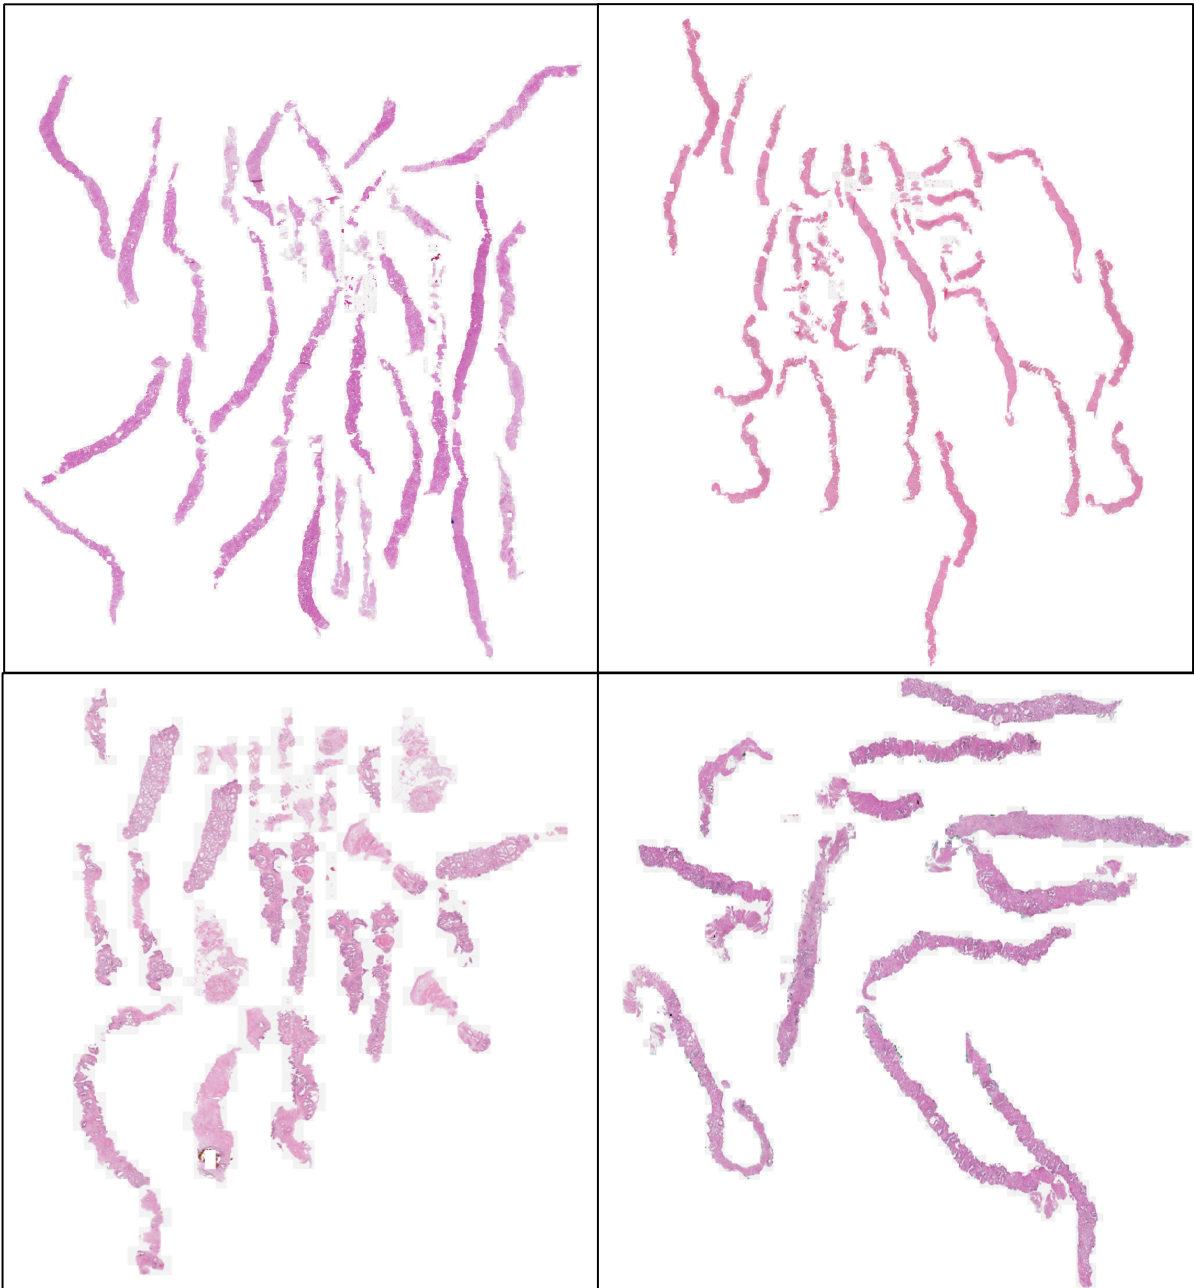

**Supplementary Figure 1. Image quilts for four example patients.** The dataset used in this study included patients with a variable number of histopathology slides. To standardize the image inputs to the model, the tissue from each slide was segmented, and all tissues were pasted into a single square image of 51200 x 51200 pixels and divided into 200 by 200 patches, representing all the histopathology data of a single patient.

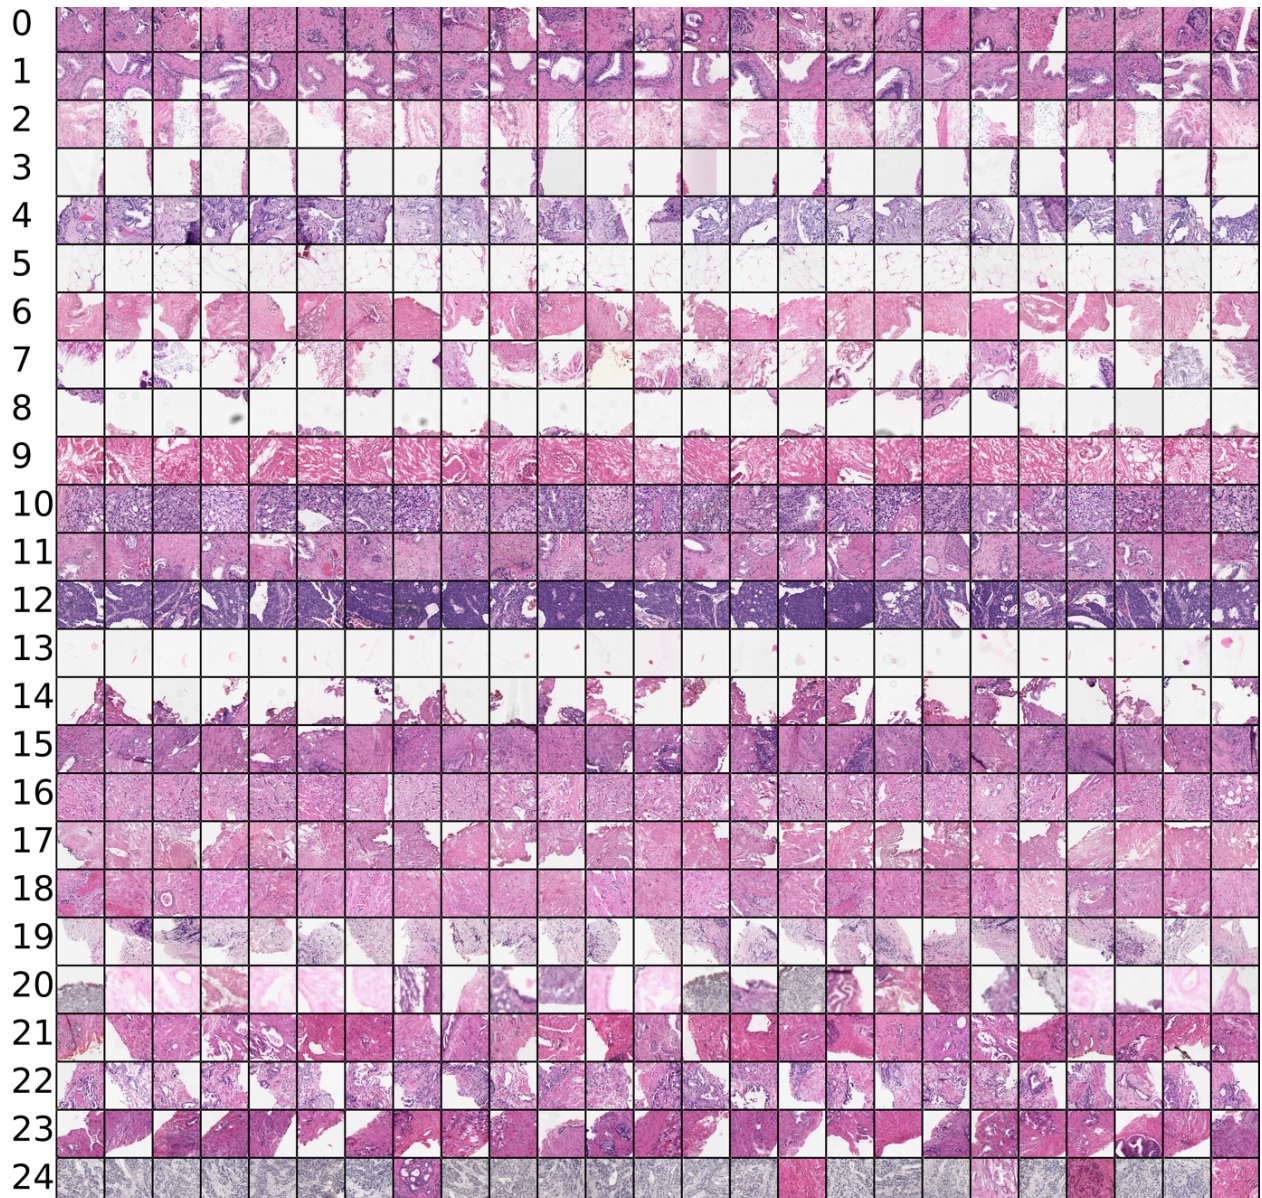

|    |                                                                              |
|----|------------------------------------------------------------------------------|
| 0  | Small scattered tumor cell clusters / glands (various Gleasons)              |
| 1  | Benign prostate glands                                                       |
| 2  | Scanning artifacts                                                           |
| 3  | Mostly whitespace                                                            |
| 4  | Clusters of individual tumor glands (mainly Gleason pattern 3)               |
| 5  | Fat tissue                                                                   |
| 6  | Prostate smooth muscle, occasional tumor glands and occasional benign glands |
| 7  | Fibro-muscular stroma                                                        |
| 8  | Small edges of tissue                                                        |
| 9  | Prostate smooth muscle, and occasional benign glands                         |
| 10 | Enlarged cribriform glands (Gleason pattern 4)                               |

|    |                                                                                            |
|----|--------------------------------------------------------------------------------------------|
| 11 | Scattered individual glands most likely benign, with prostate smooth muscle tissue         |
| 12 | Large sheets of cancer cells (Gleason patterns 4 or 5)                                     |
| 13 | Dead cells and artifacts                                                                   |
| 14 | Cauterized edge of stroma                                                                  |
| 15 | Prostate smooth muscle                                                                     |
| 16 | Scattered individual cancer cells                                                          |
| 17 | Prostate smooth muscle                                                                     |
| 18 | Smooth muscle and blood vessels                                                            |
| 19 | Loose stroma with scattered crust or small cells                                           |
| 20 | Out of focus cluster                                                                       |
| 21 | Prostate smooth muscle with scattered individual prostate glands that are mostly malignant |
| 22 | Glands of varying sizes, potentially benign or malignant                                   |
| 23 | Prostate smooth muscle, with small, crushed glands, some are cancerous, some benign        |
| 24 | Scattered cells and glands with atrophic features (Gleason patterns 4 and 3)               |

**Supplementary Figure 2. Pathologist-interpreted patch clusters.** Using UMAP, 25 clusters were generated from the self-supervised model features of all the histopathology patches from RTOG 9202. Each row in the image corresponds to the 25 nearest-neighbor image patches of the cluster centroid. These were inspected by a pathologist to determine the human-interpretable descriptions of the clusters listed in the table.
